# Supplementary material
Source: PubMed Central journal article supplement (PMC5320422)

**Supplementary Materials**

**Title: Access to electric light is associated with shorter sleep duration in a traditionally hunter-gatherer community**

Horacio O. de la Iglesia, Eduardo Fernández-Duque, Diego A. Golombek, Norberto Lanza<sup>6†</sup>, Jeanne F. Duffy, Charles A. Czeisler and Claudia R. Valeggia

**Figure S1.** Locomotor activity and light exposure recorded during the summer with wrist data loggers. (A) Raster plots of activity for Toba/Qom individuals (n=6) from the NO-Electricity and Electricity communities throughout the summer sampling days. Black bars on each 24-h horizontal line represent the activity levels. Successive days are stacked vertically. (B) Top, Two representative raster plots for activity and light exposure plotted as in (A). Bottom, a waveform for each parameter for one individual plotted by averaging the activity or light exposure throughout the sampling days for each 20-min bin.

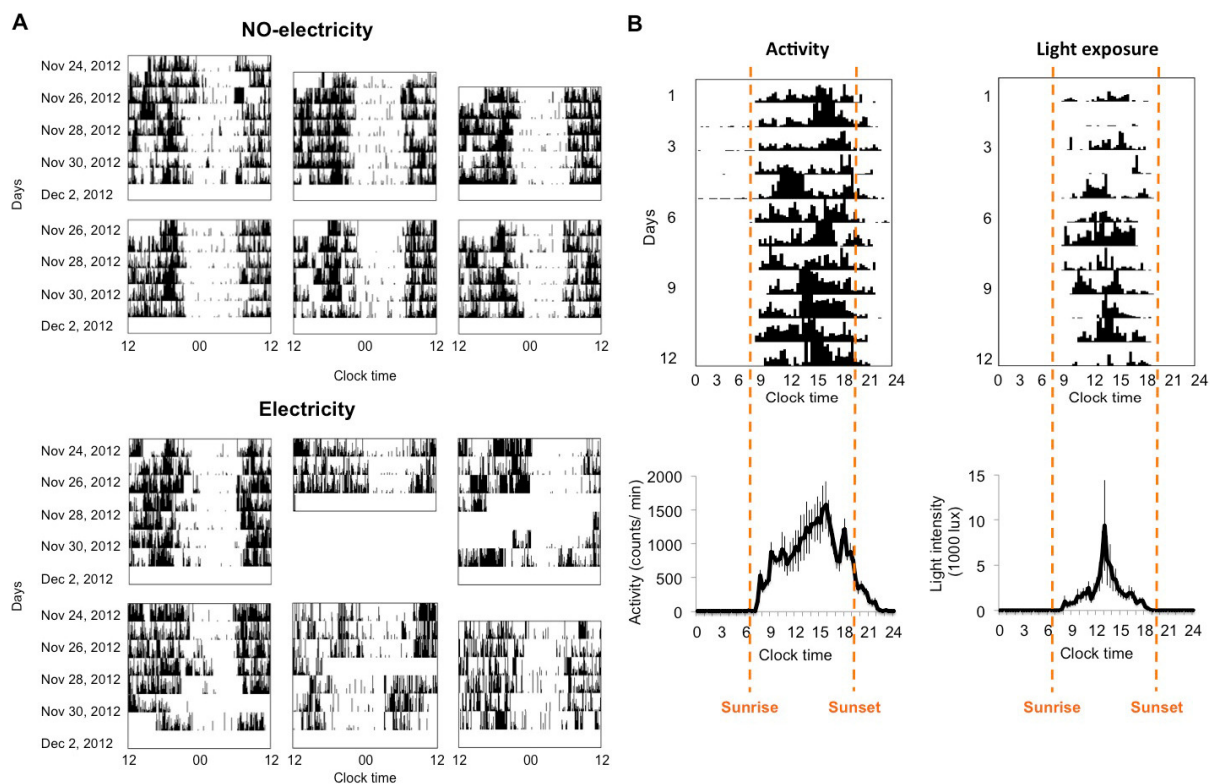

Supplement: NIHMS845157-supplement-supplement_1.pdf [file NIHMS845157-supplement-supplement_1.pdf]
